# Supplementary material for: Long-term stability of Si-organic hybrid solar cells with a thermally tunable graphene oxide platform
Source: Royal Society of Chemistry journal article supplement (doi:10.1039/c6ra12441k), 2016-01-01
Supplement: c6ra12441k1.pdf [file c6ra12441k1.pdf]

## Electric Supplementary Information

### Long-term stability of Si-organic hybrid solar cells with thermally tunable graphene oxide platform

*Beo Deul Ryu<sup>a,1</sup>, Jung-Hwan Hyung,<sup>ab,1</sup> Min Han<sup>a</sup>, Gil-Sung Kim<sup>a</sup>, Nam Han<sup>c</sup>, Kang Bok Ko<sup>a</sup>, Ko Ku Kang<sup>a</sup>, Tran Viet Cuong<sup>ad</sup>, and Chang-Hee Hong<sup>a\*</sup>*

<sup>a</sup> School of Semiconductor and Chemical Engineering, Semiconductor Physics Research Center, Chonbuk National University, Jeonju, Jellabuk-do 54896, Korea

<sup>b</sup> Department of Nanosystem Research, National Nano Fab Center (NNFC), Daejeon, 305-701, Korea

<sup>c</sup> Department of Material Science and Engineering, Pohang University of Science and Technology (POSTECH), Pohang, Gyeongbuk 790-784, Korea

<sup>d</sup> NTT Hi-Tech Institute, Nguyen Tat Thanh University, 298-300 A Nguyen Tat Thanh Street, Ho Chi Minh City, Vietnam

**This file includes:**

**Figures S1~S6.**

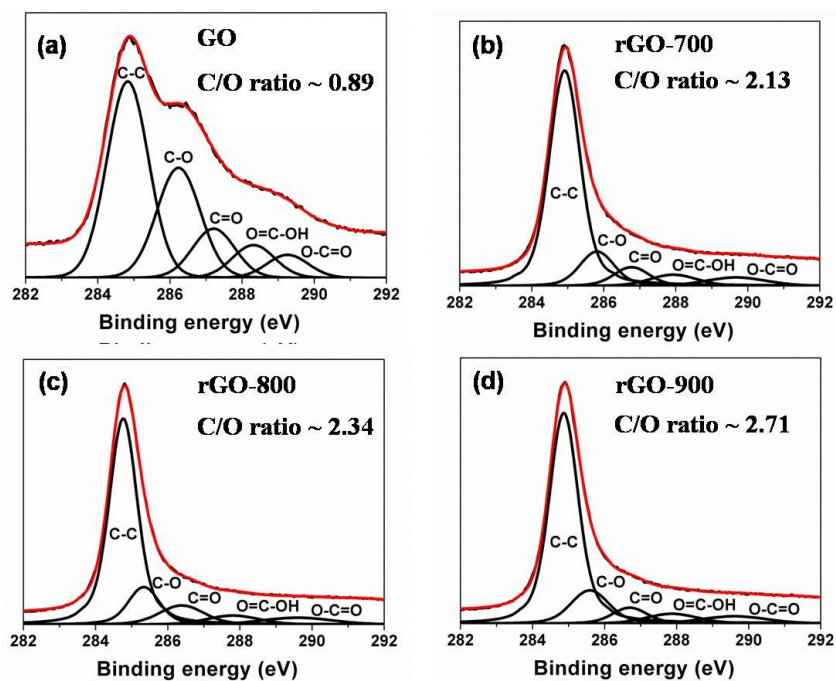

Figure S1. XPS C1s spectra of (a) GO layer, and thermally rGO by (b) annealed 700 °C, (c) annealed 800 °C, and (d) annealed 900 °C.

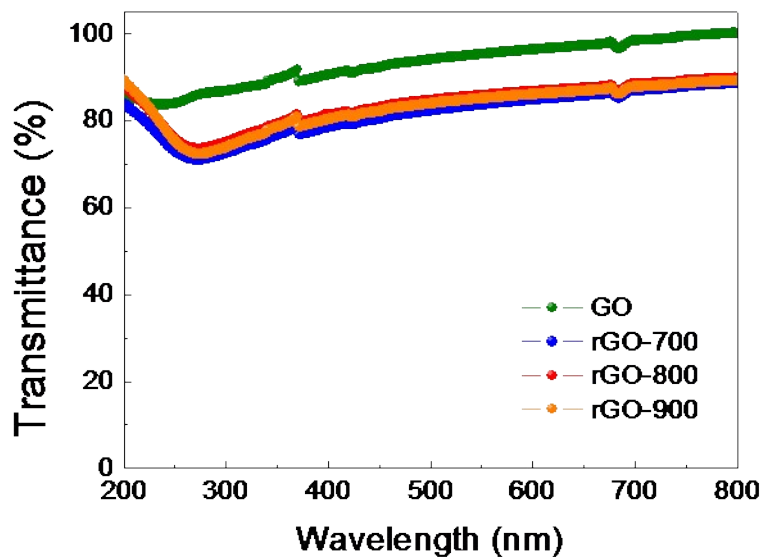

Figure S2. The optical transmission spectra of the GO and rGO layers by annealed 700, 800, and 900 °C, respectively.

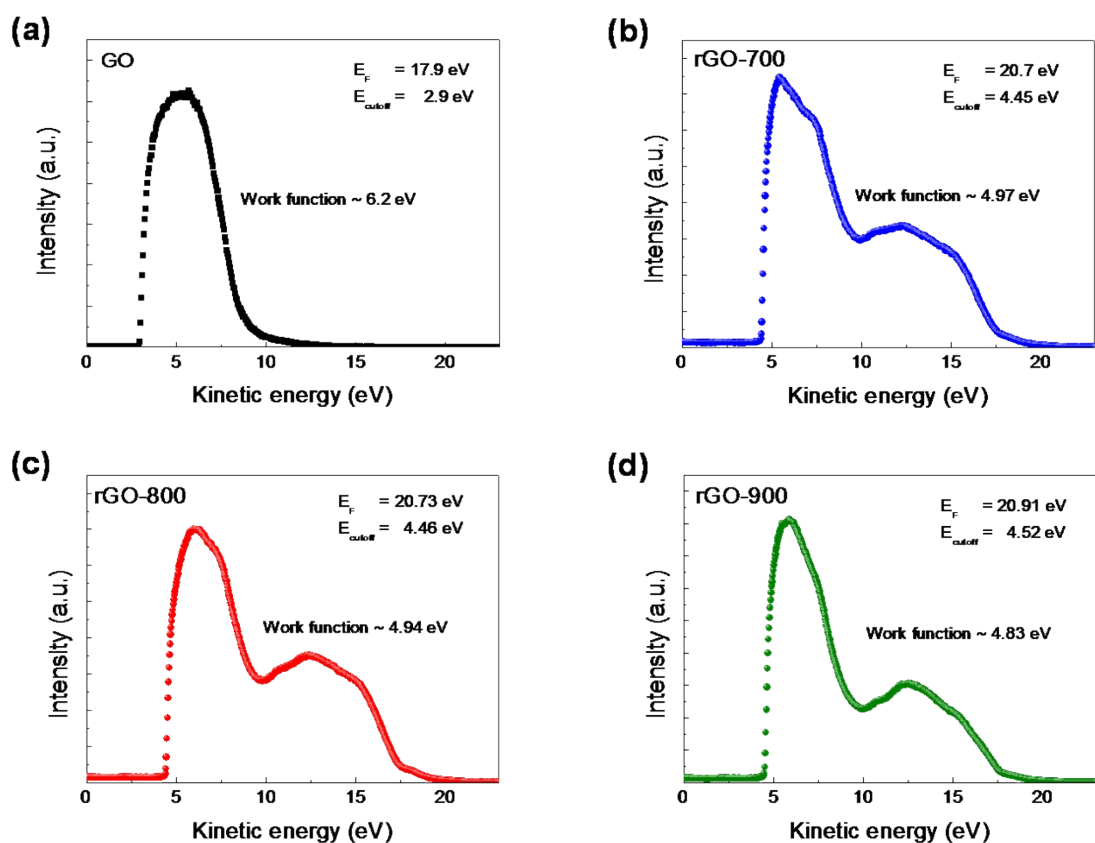

Figure S3. UPS spectra of (a) GO layer, and thermally rGO by (b) annealed 700 °C, (c) annealed 800 °C, and (d) annealed 900 °C.

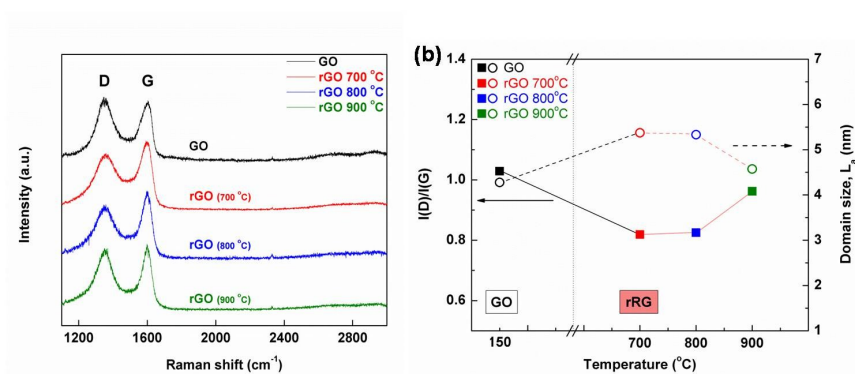

Figure S4. (a) Raman spectra of GO layer and rGO layers by annealed 700, 800, and 900 °C, respectively. (b) Variations of the I(D)/I(G) ratio and domain size with GO and rGO by several reduction temperature.

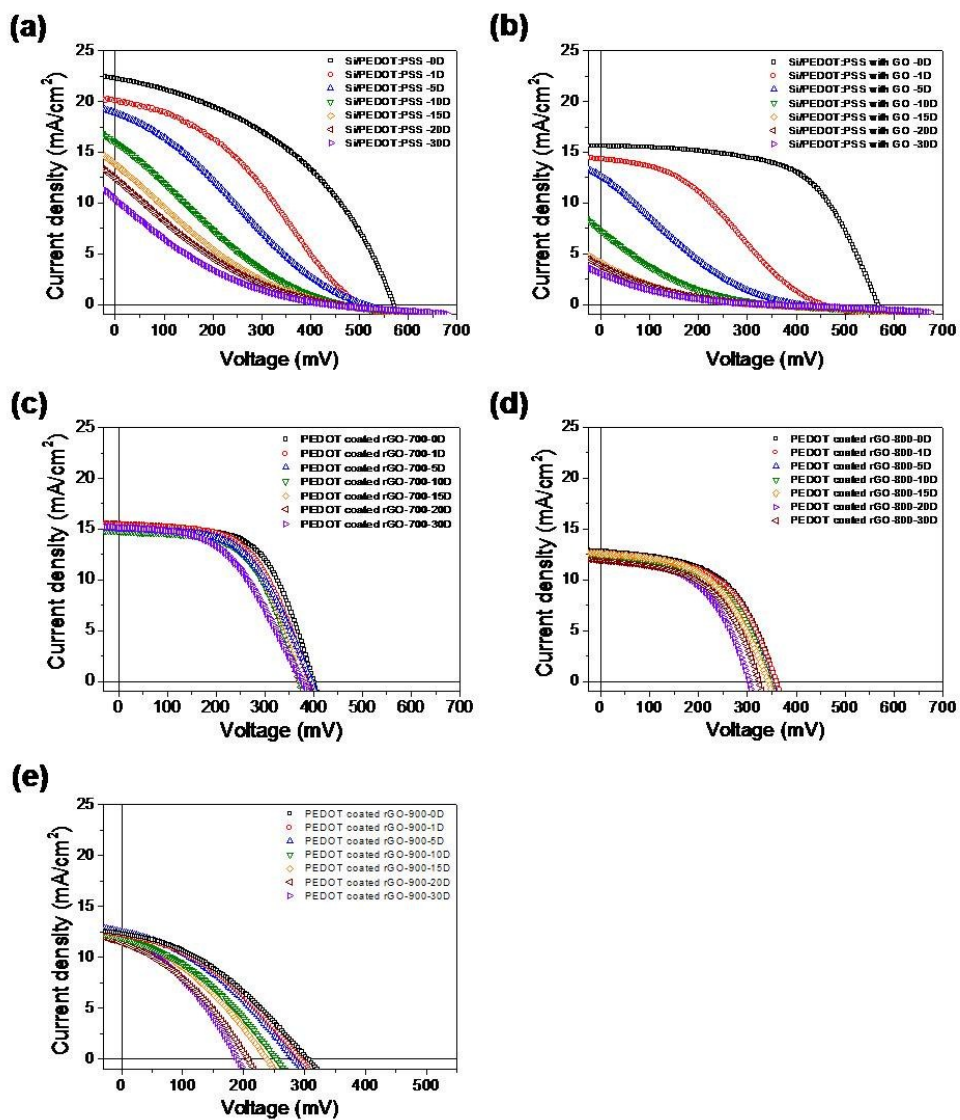

Figure S5. J-V curves of PEDOT:PSS devices (a) without GO barrier layer, (b) with GO barrier layer, (c) with rGO-700 layer, (d) with rGO-800 layer, and (e) with rGO-900 layer during 31 days.

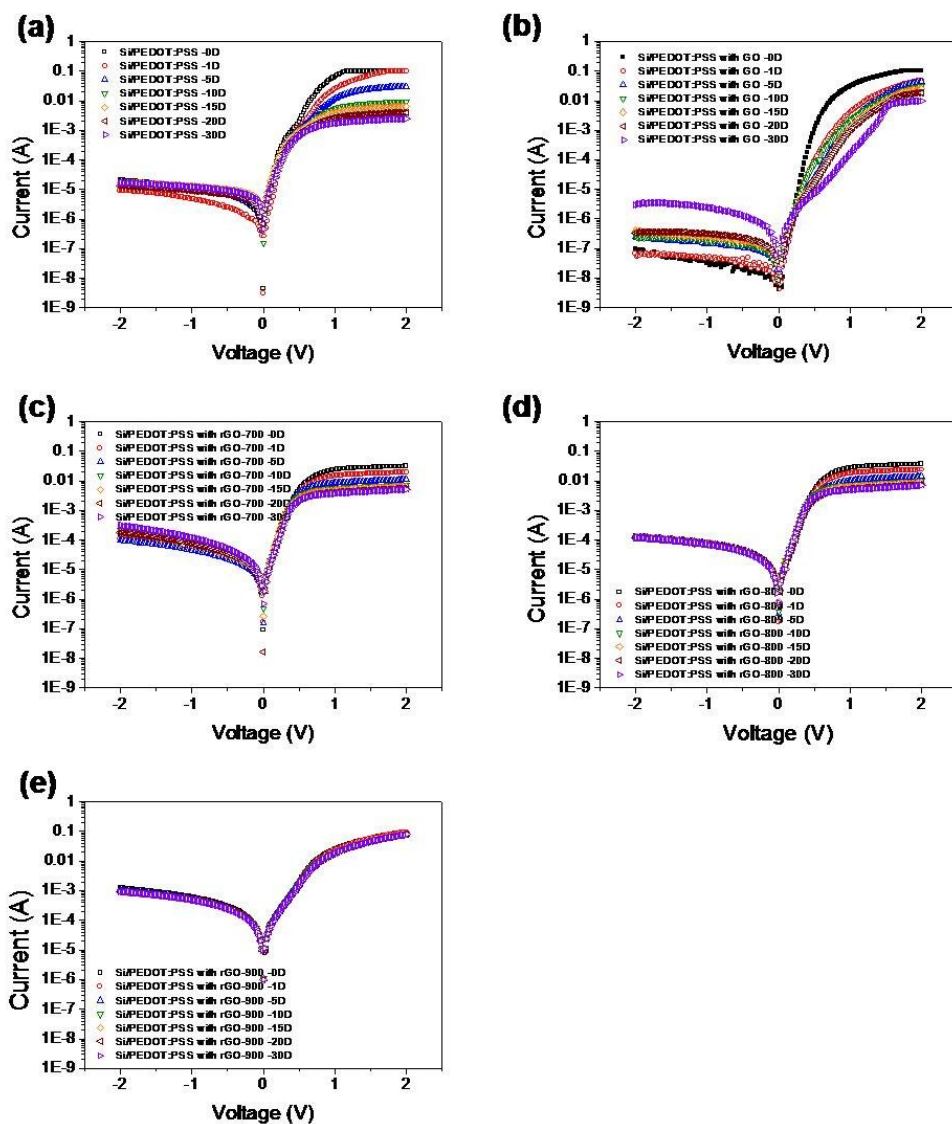

Figure S6. I-V curves of PEDOT:PSS devices (a) without GO barrier layer, (b) with GO barrier layer, (c) with rGO-700 layer, (d) with rGO-800 layer, and (e) with rGO-900 layer in dark condition during 31 days.
